# Supplementary material for: Extracellular vesicles from CLEC2-activated platelets enhance dengue virus-induced lethality via CLEC5A/TLR2
Source: PubMed Central journal article supplement (PMC6546763; doi:10.1038/s41467-019-10360-4), 2019-06-03
Supplement: 41467_2019_10360_MOESM2_ESM.pdf [file 41467_2019_10360_MOESM2_ESM.pdf]

## Supplementary information

Extracellular vesicles from CLEC2-activated platelets enhance dengue virus-induced lethality via CLEC5A/TLR2

Sung et al.

# Supplementary Figure 1

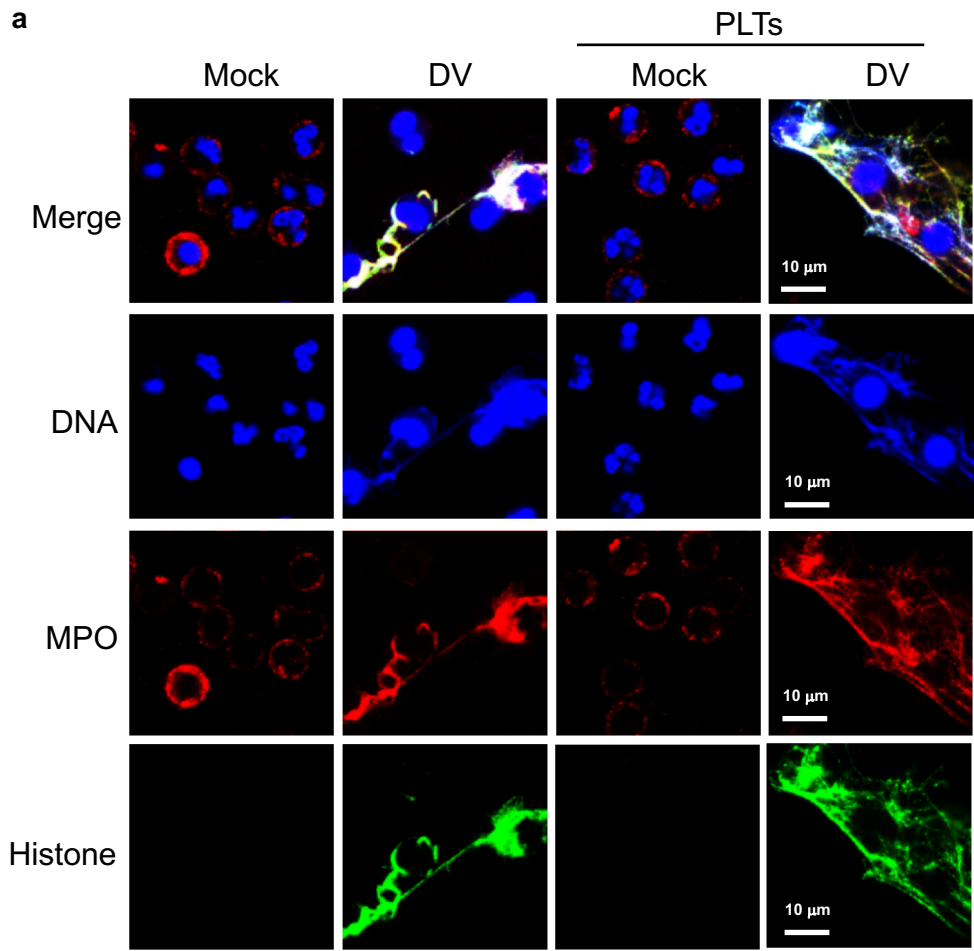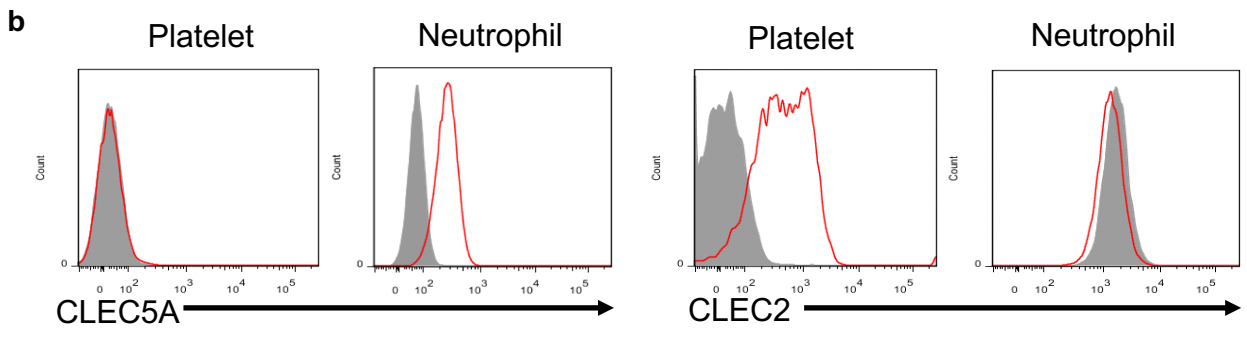

**Supplementary Figure 1.** Immunofluorescence staining of NET structure and expression levels of CLEC5A, CLEC2 in human neutrophils and platelets. (a) DNA, histone, and MPO were detected by Hoechst 33342 (blue), anti-histone antibody (green), and anti-MPO antibody (red), respectively. Scale bar: 10  $\mu$ m. (b) Expression level of CLEC5A and CLEC2 in human platelet and neutrophil were determined by flow cytometry.

# Supplementary Figure 2

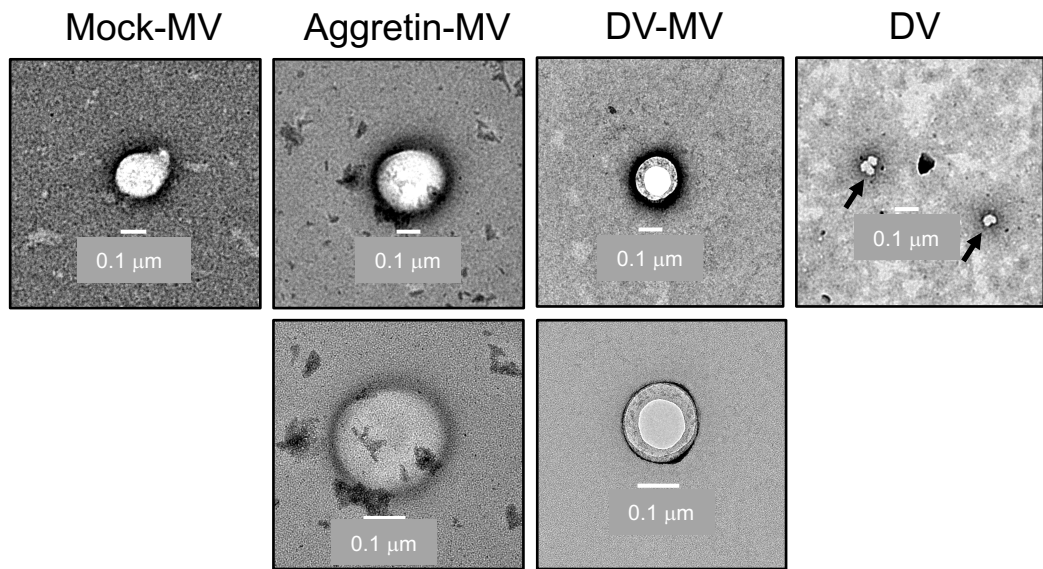

**Supplementary Figure 2.** Ultrastructure of DV-activated platelets-derived MVs and EXOs. Ultrastructure was observed under transmission electron microscopy. Scale bar: 0.1 μm

### Supplementary Figure 3

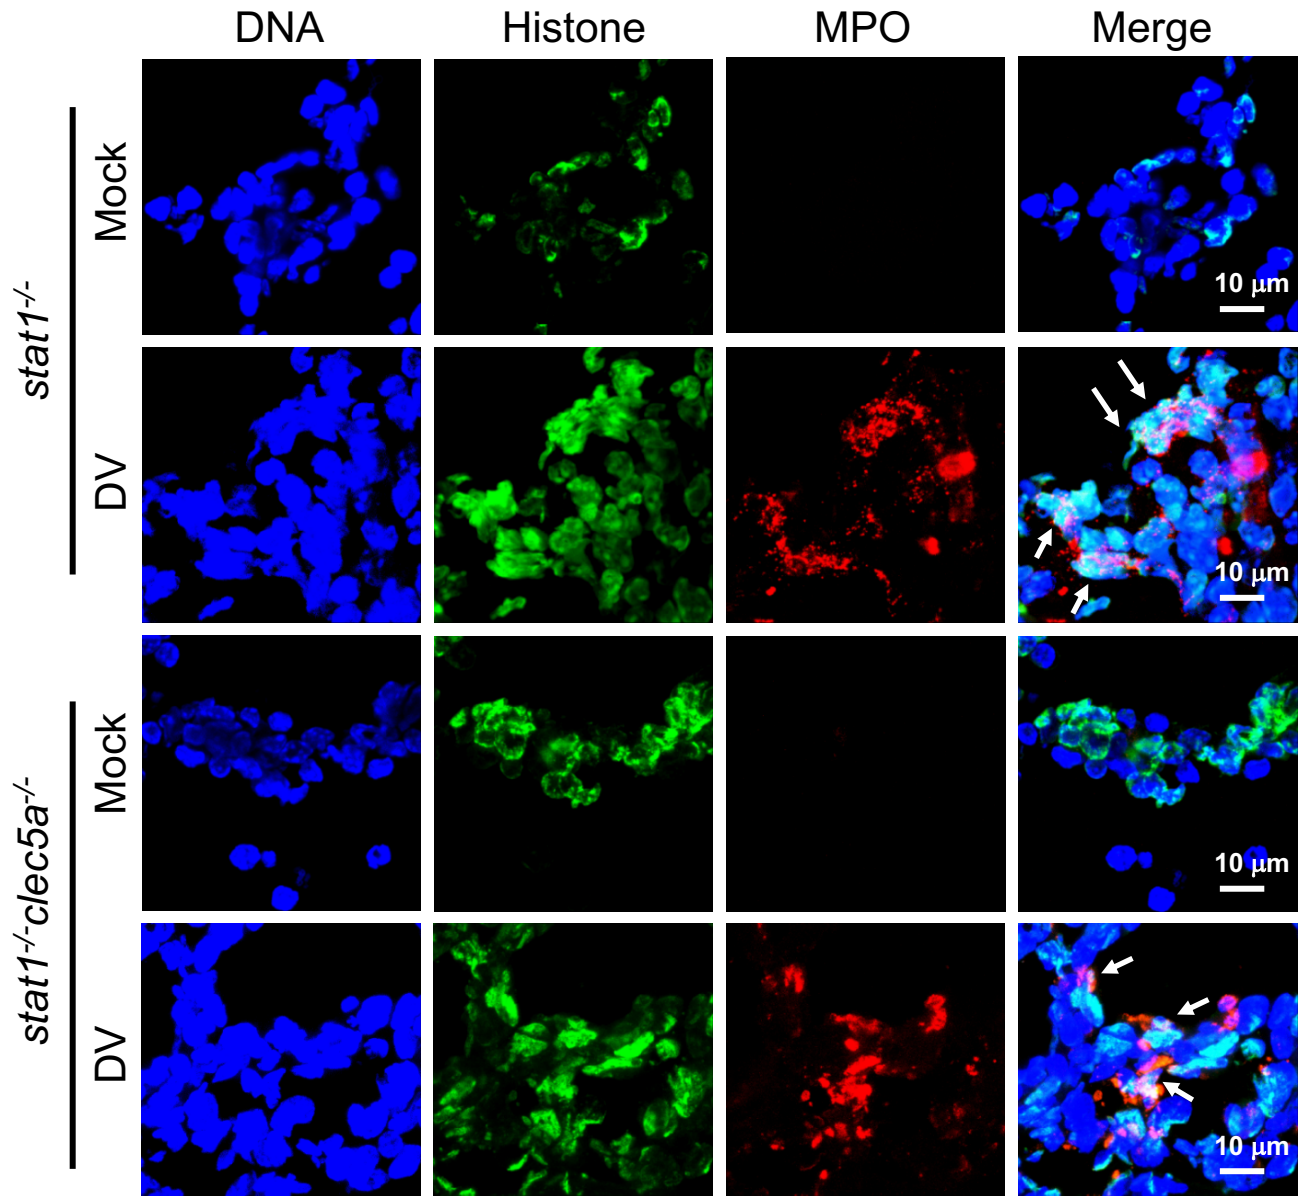

**Supplementary Figure 3.** Immunofluorescence staining of the NET structure in spleen of DV-challenged mice. *Stat1*<sup>-/-</sup> and *stat1*<sup>-/-</sup>*clec5a*<sup>-/-</sup> mice were inoculated with DV (NGC-N, 2x10<sup>5</sup> PFU) via intraperitoneal route. Spleens were harvested and fixed at day 5 post-infection for immunofluorescence staining using anti-MPO mAb (red), anti-histone mAb (green), and Hoechst 33342 (blue). Scale bar: 10 μm

# Supplementary Figure 4

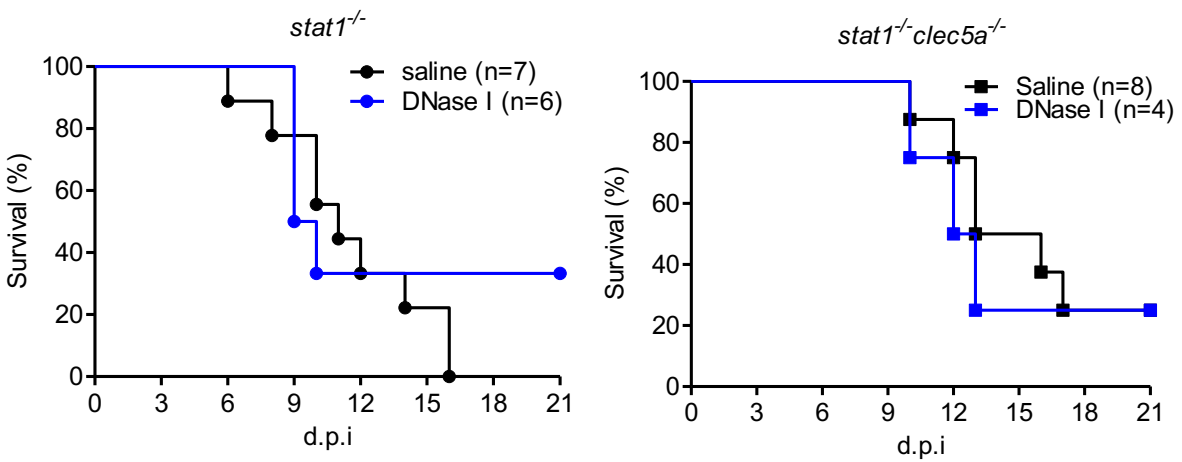

**Supplementary Figure 4.** DNase I injection rescues the survival rate in DV-challenged *stat1*<sup>-/-</sup> mice. *Stat1*<sup>-/-</sup> mice (left panels) and *stat1*<sup>-/-</sup> *clec5a*<sup>-/-</sup> mice (right panels) were challenged with lethal dose of DV via intraperitoneal route. DNase I (4 KU) were injected intraperitoneally at day 0, 2, 4, and 6 post infection. Survival rate was measured every day till day 21 post-infection.

# Supplementary Figure 5

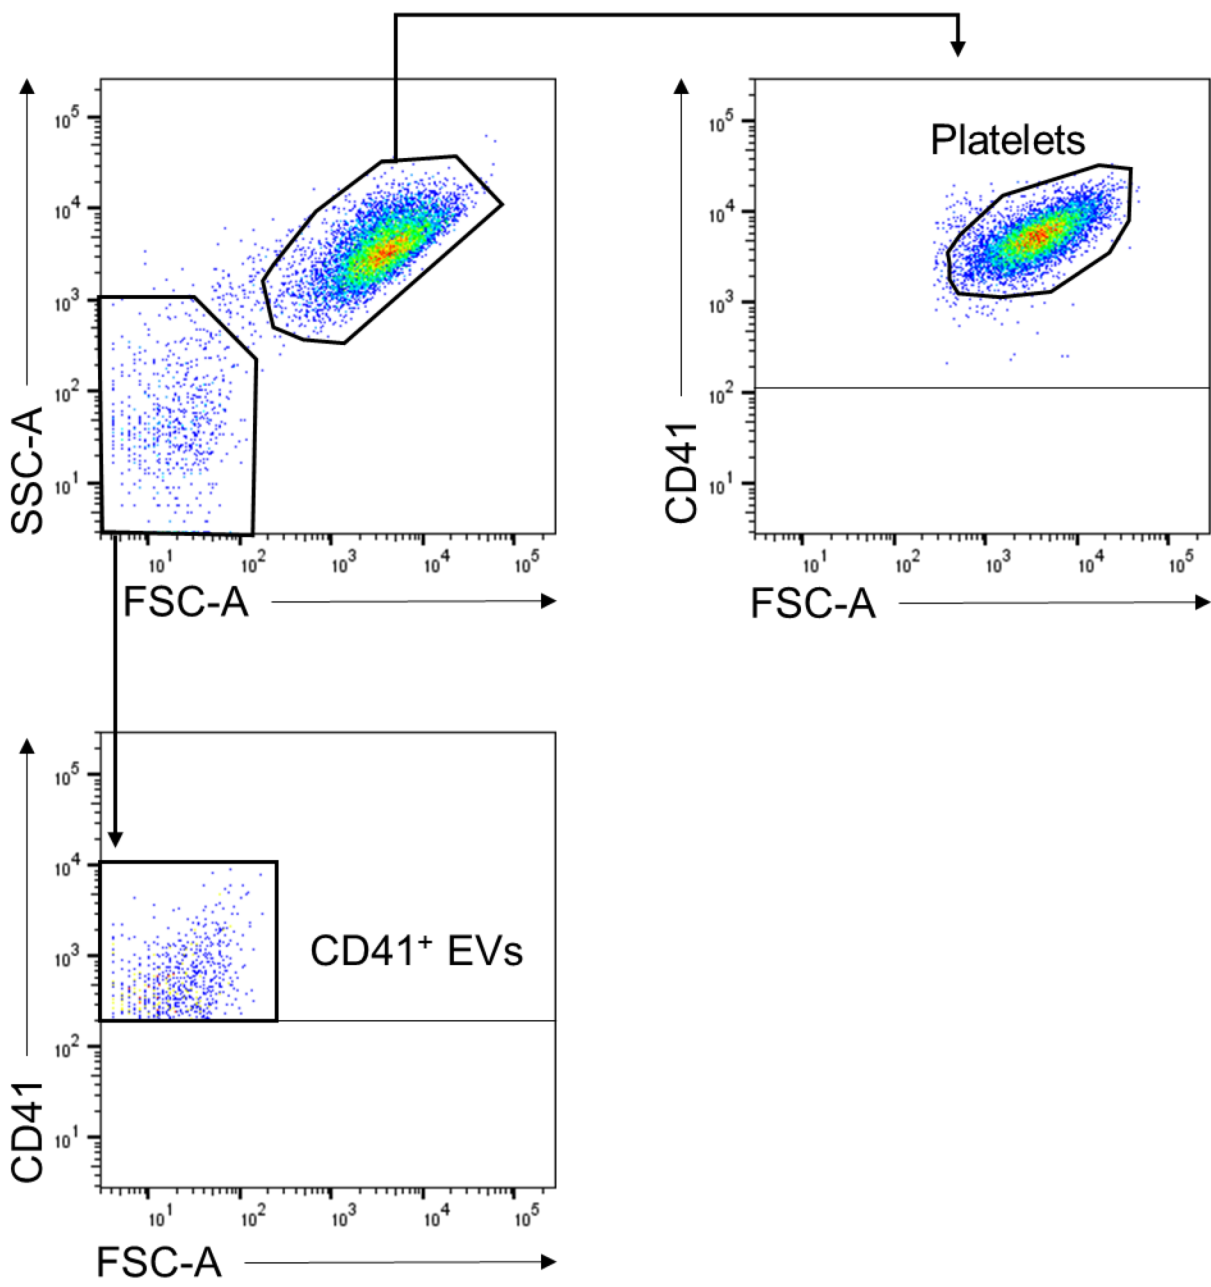

**Supplementary Figure 5.** Gating strategy for platelet population and CD41<sup>+</sup> EVs. Gating strategy for human/mouse platelets and CD41<sup>+</sup> EVs for Fig. 1a, and Fig. 3a.

## Supplementary Table 1

|             | <b>Protein name</b>                                               | <b>Gene name</b> | <b>Increase/Decrease</b> | <b>Significantly different compared to mock (Score)</b> |
|-------------|-------------------------------------------------------------------|------------------|--------------------------|---------------------------------------------------------|
| <b>MVs</b>  | Tubulin beta-1 chain                                              | TUBB1            | ↑                        | 28.166                                                  |
|             | Guanine nucleotide-binding protein G(I)/G(S)/G(O) subunit gamma-3 | GNG3             | ↑                        | 6.0121                                                  |
|             | Tribbles homolog 1                                                | TRIB1            | ↑                        | 5.8874                                                  |
| <b>EXOs</b> | Vinculin                                                          | VCL              | ↑                        | 21.874                                                  |
|             | Coagulation factor XIII A chain                                   | F13A1            | ↑                        | 18.076                                                  |
|             | Calnexin                                                          | CANX             | ↑                        | 11.591                                                  |

**Supplementary Table 1.** Mass spectrometry analysis of aggrein- and DV-activated platelets-derived MVs and EXOs. Proteomic comparison of MVs and EXOs from resting platelets and CLEC2-activated platelets by LTQ Orbitrap XL mass spectrometer. Unique proteins which up expressed in CLEC2-MVs and EXOs are listed.
